# Supplementary material for: Ectopic Expression of a Wheat R2R3-Type MYB Gene in Transgenic Tobacco Enhances Osmotic Stress Tolerance via Maintaining ROS Balance and Improving Root System Architecture
Source: MDPI journal article supplement (doi:10.3390/biology13020128), 2024-02-18
Supplement: s1 [file s1]

**Table S1.** Segregation analysis of *TaODORANT1* gene in T1 generation progeny transgenic lines

| Lines | Number of<br>germinated<br>seeds | Kanamycin<br>(+) | Kanamycin<br>(-) | % K+  | % K-  | Expected<br>K+ | Expected<br>K- | Segregation<br>Mendelian<br>ratios | Calculated<br>Chi-Square<br>Value | Copies<br>number |
|-------|----------------------------------|------------------|------------------|-------|-------|----------------|----------------|------------------------------------|-----------------------------------|------------------|
| L1    | 47                               | 34               | 13               | 72.34 | 27.66 | 35.25          | 11.75          | 3:1                                | 0.18                              | 1                |
| L2    | 51                               | 50               | 1                | 98.04 | 1.96  | 50.20          | 0.80           | 63:1                               | 0.05                              | 3                |
| L4    | 51                               | 45               | 6                | 88.24 | 11.76 | 47.81          | 3.19           | 15:1                               | 2.65                              | 2                |
| L17   | 51                               | 37               | 14               | 72.55 | 27.45 | 38.25          | 12.75          | 3:1                                | 0.16                              | 1                |
| L21   | 50                               | 38               | 12               | 76.00 | 24.00 | 37.50          | 12.50          | 3:1                                | 0.03                              | 1                |
| L35   | 49                               | 37               | 12               | 75.51 | 24.49 | 36.75          | 12.25          | 3:1                                | 0.01                              | 1                |
| L50   | 49                               | 37               | 12               | 75.51 | 24.49 | 36.75          | 12.25          | 3:1                                | 0.01                              | 1                |

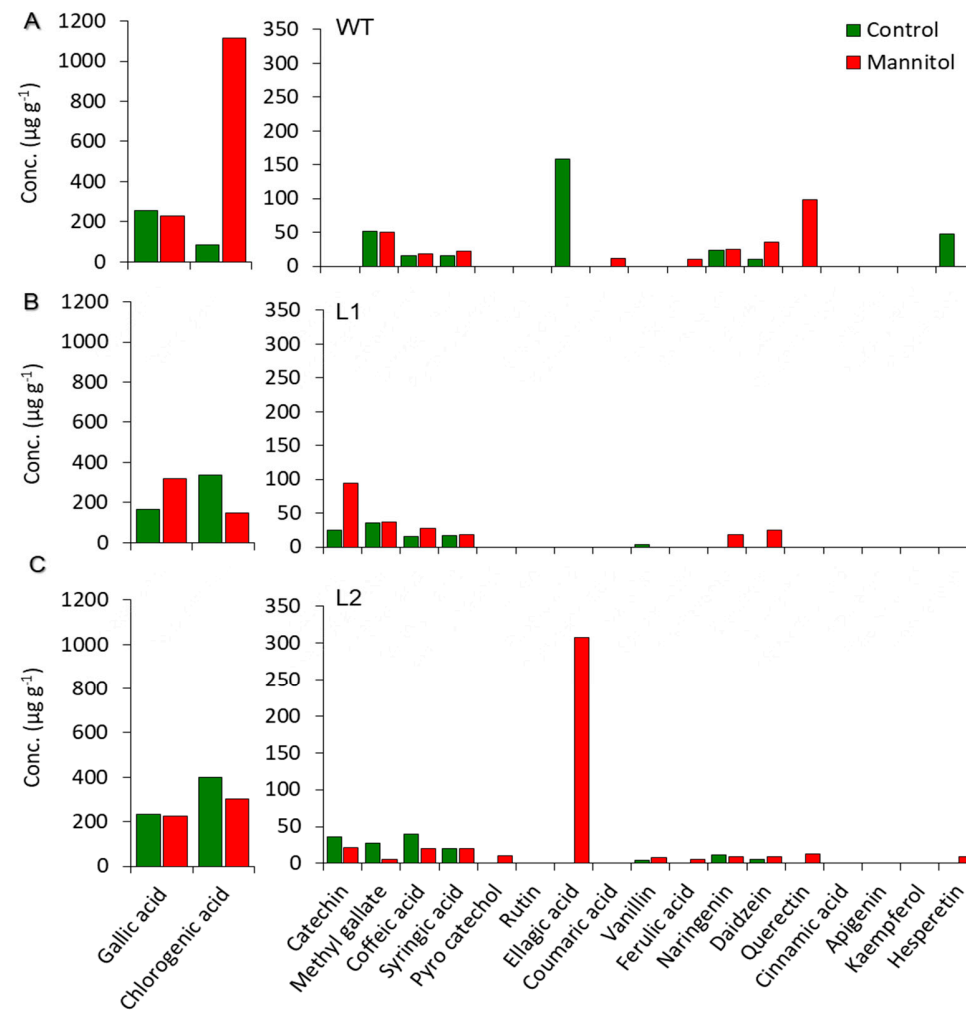

**Figure S1.** Concentration of different phenolic compounds within the wild and transgenic lines of tobacco plants either under control or osmotic stress (400 mM mannitol).
